# Supplementary material for: Epidemiology, haematology and molecular characterization of haemoprotozoon and rickettsial organisms causing infections in cattle of Jammu region, North India
Source: PubMed Central journal article supplement (PMC8207732; doi:10.1186/s12917-021-02915-9), 2021-06-15
Supplement: 12917_2021_2915_MOESM2_ESM.pdf [file 12917_2021_2915_MOESM2_ESM.pdf]

Sunday, March 30, 2014 4:31 PM

|     |                                                   |                                |
|-----|---------------------------------------------------|--------------------------------|
|     | T C C A T T C A A G T T T C T G C C C C A T C A G | Majority                       |
|     | 10 20                                             |                                |
| 1   | T C C A T T C A A G T T T C T G C C C C A T C A G | B.bigemina_Jammu_MN566925.1    |
| 1   | T C C A T T C A A G T T T C T G C C C C A T C A G | B.bigemina_Kathua_MN567603     |
| 1   | T C C A T T C A A G T T T C T G C C C C A T C A G | B.bigemina_udhampur_MN566924.1 |
|     | C T T G A C G G T A G G G T A T T G G C C T A C C | Majority                       |
|     | 30 40 50                                          |                                |
| 26  | C T T G A C G G T A G G G T A T T G G C C T A C C | B.bigemina_Jammu_MN566925.1    |
| 26  | C T T G A C G G T A G G G T A T T G G C C T A C C | B.bigemina_Kathua_MN567603     |
| 26  | C T T G A C G G T A G G G T A T T G G C C T A C C | B.bigemina_udhampur_MN566924.1 |
|     | G A G G C A G C A A C G G G T A A C G G G G A A T | Majority                       |
|     | 60 70                                             |                                |
| 51  | G A G G C A G C A A C G G G T A A C G G G G A A T | B.bigemina_Jammu_MN566925.1    |
| 51  | G A G G C A G C A A C G G G T A A C G G G G A A T | B.bigemina_Kathua_MN567603     |
| 51  | G A G G C A G C A A C G G G T A A C G G G G A A T | B.bigemina_udhampur_MN566924.1 |
|     | T A G G G T T C G A T T C C G G A G A G G G A G C | Majority                       |
|     | 80 90 100                                         |                                |
| 76  | T A G G G T T C G A T T C C G G A G A G G G A G C | B.bigemina_Jammu_MN566925.1    |
| 76  | T A G G G T T C G A T T C C G G A G A G G G A G C | B.bigemina_Kathua_MN567603     |
| 76  | T A G G G T T C G A T T C C G G A G A G G G A G C | B.bigemina_udhampur_MN566924.1 |
|     | C T G A G A A A C G G C T A C C A C A T C T A A G | Majority                       |
|     | 110 120                                           |                                |
| 101 | C T G A G A A A C G G C T A C C A C A T C T A A G | B.bigemina_Jammu_MN566925.1    |
| 101 | C T G A G A A A C G G C T A C C A C A T C T A A G | B.bigemina_Kathua_MN567603     |
| 101 | C T G A G A A A C G G C T A C C A C A T C T A A G | B.bigemina_udhampur_MN566924.1 |
|     | G A A G G C A G C A G G C G C G C A A A T T A C C | Majority                       |
|     | 130 140 150                                       |                                |
| 126 | G A A G G C A G C A G G C G C G C A A A T T A C C | B.bigemina_Jammu_MN566925.1    |
| 126 | G A A G G C A G C A G G C G C G C A A A T T A C C | B.bigemina_Kathua_MN567603     |
| 126 | G A A G G C A G C A G G C G C G C A A A T T A C C | B.bigemina_udhampur_MN566924.1 |
|     | C A A T C C T G A C A C A G G G A G G T A G T G A | Majority                       |
|     | 160 170                                           |                                |
| 151 | C A A T C C T G A C A C A G G G A G G T A G T G A | B.bigemina_Jammu_MN566925.1    |
| 151 | C A A T C C T G A C A C A G G G A G G T A G T G A | B.bigemina_Kathua_MN567603     |
| 151 | C A A T C C T G A C A C A G G G A G G T A G T G A | B.bigemina_udhampur_MN566924.1 |
|     | C A A G A A A T A A C A A T A C A G G G C T T T C | Majority                       |
|     | 180 190 200                                       |                                |
| 176 | C A A G A A A T A A C A A T A C A G G G C T T T C | B.bigemina_Jammu_MN566925.1    |
| 176 | C A A G A A A T A A C A A T A C A G G G C T T T C | B.bigemina_Kathua_MN567603     |
| 176 | C A A G A A A T A A C A A T A C A G G G C T T T C | B.bigemina_udhampur_MN566924.1 |
|     | G T C T T G T A A T T G G A A T G A T G G T G A T | Majority                       |
|     | 210 220                                           |                                |
| 201 | G T C T T G T A A T T G G A A T G A T G G T G A T | B.bigemina_Jammu_MN566925.1    |
| 201 | G T C T T G T A A T T G G A A T G A T G G T G A T | B.bigemina_Kathua_MN567603     |
| 201 | G T C T T G T A A T T G G A A T G A T G G T G A T | B.bigemina_udhampur_MN566924.1 |

Sunday, March 30, 2014 4:31 PM

|     |                                                                                               |                                |
|-----|-----------------------------------------------------------------------------------------------|--------------------------------|
|     | G T A C A A C C T C A C C A G A G T A C C A A T T                                             | Majority                       |
|     | 230 <span style="margin-left: 150px;">240</span> <span style="margin-left: 150px;">250</span> |                                |
| 226 | G T A C A A C C T C A C C A G A G T A C C A A T T                                             | B.bigemina_Jammu_MN566925.1    |
| 226 | G T A C A A C C T C A C C A G A G T A C C A A T T                                             | B.bigemina_Kathua_MN567603     |
| 226 | G T A C A A C C T C A C C A G A G T A C C A A T T                                             | B.bigemina_udhampur_MN566924.1 |
|     | G G A G G G C A A G T C T G G T G C C A G C A G C                                             | Majority                       |
|     | 260 <span style="margin-left: 150px;">270</span>                                              |                                |
| 251 | G G A G G G C A A G T C T G G T G C C A G C A G C                                             | B.bigemina_Jammu_MN566925.1    |
| 251 | G G A G G G C A A G T C T G G T G C C A G C A G C                                             | B.bigemina_Kathua_MN567603     |
| 251 | G G A G G G C A A G T C T G G T G C C A G C A G C                                             | B.bigemina_udhampur_MN566924.1 |
|     | C G C G G T A A T T C C A G C T C C A A T A G C G                                             | Majority                       |
|     | 280 <span style="margin-left: 150px;">290</span> <span style="margin-left: 150px;">300</span> |                                |
| 276 | C G C G G T A A T T C C A G C T C C A A T A G C G                                             | B.bigemina_Jammu_MN566925.1    |
| 276 | C G C G G T A A T T C C A G C T C C A A T A G C G                                             | B.bigemina_Kathua_MN567603     |
| 276 | C G C G G T A A T T C C A G C T C C A A T A G C G                                             | B.bigemina_udhampur_MN566924.1 |
|     | T A T A T T A A A C T T G T T G C A G T T A A A A                                             | Majority                       |
|     | 310 <span style="margin-left: 150px;">320</span>                                              |                                |
| 301 | T A T A T T A A A C T T G T T G C A G T T A A A A                                             | B.bigemina_Jammu_MN566925.1    |
| 301 | T A T A T T A A A C T T G T T G C A G T T A A A A                                             | B.bigemina_Kathua_MN567603     |
| 301 | T A T A T T A A A C T T G T T G C A G T T A A A A                                             | B.bigemina_udhampur_MN566924.1 |
|     | A G C T C G T A G T T G T A T T T C A G C C T C G                                             | Majority                       |
|     | 330 <span style="margin-left: 150px;">340</span> <span style="margin-left: 150px;">350</span> |                                |
| 326 | A G C T C G T A G T T G T A T T T C A G C C T C G                                             | B.bigemina_Jammu_MN566925.1    |
| 326 | A G C T C G T A G T T G T A T T T C A G C C T C G                                             | B.bigemina_Kathua_MN567603     |
| 326 | A G C T C G T A G T T G T A T T T C A G C C T C G                                             | B.bigemina_udhampur_MN566924.1 |
|     | C G T T T T T C C C T G G T T T T G G G T C T T                                               | Majority                       |
|     | 360 <span style="margin-left: 150px;">370</span>                                              |                                |
| 351 | C G T T T T T C C C T G G T T T T G G G T C T T                                               | B.bigemina_Jammu_MN566925.1    |
| 351 | C G T T T T T C C C T G G T T T T G G G T C T T                                               | B.bigemina_Kathua_MN567603     |
| 351 | C G T T T T T C C C T G G T T T T G G G T C T T                                               | B.bigemina_udhampur_MN566924.1 |
|     | T T C G C T G G C T T T T T T T T A C T T T G A                                               | Majority                       |
|     | 380 <span style="margin-left: 150px;">390</span> <span style="margin-left: 150px;">400</span> |                                |
| 376 | T T C G C T G G C T T T T T T T T A C T T T G A                                               | B.bigemina_Jammu_MN566925.1    |
| 376 | T T C G C T G G C T T T T T T T T A C T T T G A                                               | B.bigemina_Kathua_MN567603     |
| 376 | T T C G C T G G C T T T T T T T T A C T T T G A                                               | B.bigemina_udhampur_MN566924.1 |
|     | G A A A A T T A G A G T G T T T C A A G C A G A C                                             | Majority                       |
|     | 410 <span style="margin-left: 150px;">420</span>                                              |                                |
| 401 | G A A A A T T A G A G T G T T T C A A G C A G A C                                             | B.bigemina_Jammu_MN566925.1    |
| 401 | G A A A A T T A G A G T G T T T C A A G C A G A C                                             | B.bigemina_Kathua_MN567603     |
| 401 | G A A A A T T A G A G T G T T T C A A G C A G A C                                             | B.bigemina_udhampur_MN566924.1 |
|     | T T T T G T C T T G A A T A C T T C A G C A T G G                                             | Majority                       |
|     | 430 <span style="margin-left: 150px;">440</span> <span style="margin-left: 150px;">450</span> |                                |
| 426 | T T T T G T C T T G A A T A C T T C A G C A T G G                                             | B.bigemina_Jammu_MN566925.1    |
| 426 | T T T T G T C T T G A A T A C T T C A G C A T G G                                             | B.bigemina_Kathua_MN567603     |
| 426 | T T T T G T C T T G A A T A C T T C A G C A T G G                                             | B.bigemina_udhampur_MN566924.1 |

Sunday, March 30, 2014 4:31 PM

|     |   |   |   |   |     |   |   |   |     |   |   |   |   |   |     |   |   |   |   |     |   |   |   |   |     |                                |
|-----|---|---|---|---|-----|---|---|---|-----|---|---|---|---|---|-----|---|---|---|---|-----|---|---|---|---|-----|--------------------------------|
|     | A | A | T | A | A   | T | A | G | A   | G | T | A | G | G | A   | C | C | T | T | G   | G | T | T | C | T   | Majority                       |
|     |   |   |   |   |     |   |   |   | 460 |   |   |   |   |   |     |   |   |   |   | 470 |   |   |   |   |     |                                |
| 451 | A | A | T | A | A   | T | A | G | A   | G | T | A | G | G | A   | C | C | T | T | G   | G | T | T | C | T   | B.bigemina_Jammu_MN566925.1    |
| 451 | A | A | T | A | A   | T | A | G | A   | G | T | A | G | G | A   | C | C | T | T | G   | G | T | T | C | T   | B.bigemina_Kathua_MN567603     |
| 451 | A | A | T | A | A   | T | A | G | A   | G | T | A | G | G | A   | C | C | T | T | G   | G | T | T | C | T   | B.bigemina_udhampur_MN566924.1 |
|     | A | T | T | T | T   | G | T | T | G   | C | T | T | T | T | G   | A | G | C | C | T   | T | G | G | T | A   | Majority                       |
|     |   |   |   |   | 480 |   |   |   |     |   |   |   |   |   | 490 |   |   |   |   |     |   |   |   |   | 500 |                                |
| 476 | A | T | T | T | T   | G | T | T | G   | C | T | T | T | T | G   | A | G | C | C | T   | T | G | G | T | A   | B.bigemina_Jammu_MN566925.1    |
| 476 | A | T | T | T | T   | G | T | T | G   | C | T | T | T | T | G   | A | G | C | C | T   | T | G | G | T | A   | B.bigemina_Kathua_MN567603     |
| 476 | A | T | T | T | T   | G | T | T | G   | C | T | T | T | T | G   | A | G | C | C | T   | T | G | G | T | A   | B.bigemina_udhampur_MN566924.1 |
|     | A | T | G | G |     |   |   |   |     |   |   |   |   |   |     |   |   |   |   |     |   |   |   |   |     | Majority                       |
| 501 | A | T | G | G |     |   |   |   |     |   |   |   |   |   |     |   |   |   |   |     |   |   |   |   |     | B.bigemina_Jammu_MN566925.1    |
| 501 | A | T | G | G |     |   |   |   |     |   |   |   |   |   |     |   |   |   |   |     |   |   |   |   |     | B.bigemina_Kathua_MN567603     |
| 501 | A | T | G | G |     |   |   |   |     |   |   |   |   |   |     |   |   |   |   |     |   |   |   |   |     | B.bigemina_udhampur_MN566924.1 |

Decoration 'Decoration #1': Shade (with solid deep red) residues that differ from the Consensus.
