# Supplementary material for: Epidemiology, haematology and molecular characterization of haemoprotozoon and rickettsial organisms causing infections in cattle of Jammu region, North India
Source: PubMed Central journal article supplement (PMC8207732; doi:10.1186/s12917-021-02915-9), 2021-06-15
Supplement: 12917_2021_2915_MOESM3_ESM.pdf [file 12917_2021_2915_MOESM3_ESM.pdf]

Sunday, March 30, 2014 4:17 PM

|     |                                                   |             |                                     |
|-----|---------------------------------------------------|-------------|-------------------------------------|
|     | - - - - -                                         |             | Majority                            |
|     |                                                   | 10 20       |                                     |
| 1   | - - - - -                                         |             | T.annulata_Jammu_MT113479           |
| 1   | A T G T T G T C A G G A C C A C C C T C A A G T   |             | T.annulata AF214840.1 Hisar.seq     |
| 1   | - - - - -                                         |             | T.annulata MF346013.1 Izatnagar.seq |
|     | - - - - -                                         |             | Majority                            |
|     |                                                   | 30 40 50    |                                     |
| 1   | - - - - -                                         |             | T.annulata_Jammu_MT113479           |
| 26  | T C T T A T A T T T G A G C T T C T T C G T T A T |             | T.annulata AF214840.1 Hisar.seq     |
| 1   | - - - - -                                         |             | T.annulata MF346013.1 Izatnagar.seq |
|     | - - - A T C C G T T A A T G C T G C A A A T G A G |             | Majority                            |
|     |                                                   | 60 70       |                                     |
| 1   | - - - - -                                         |             | T.annulata_Jammu_MT113479           |
| 51  | C T C A T C C G T T A A T G C T G C A A A T G A G |             | T.annulata AF214840.1 Hisar.seq     |
| 1   | - - - A T C C G T T A A T G C T G C A A A T G A G |             | T.annulata MF346013.1 Izatnagar.seq |
|     | G A G G A A A A G A A A A A G G A G G A A A A A A |             | Majority                            |
|     |                                                   | 80 90 100   |                                     |
| 21  | G A G G A A A A G A A A A A G G A G G A A A A A A |             | T.annulata_Jammu_MT113479           |
| 76  | G A G G A A A A G A A A A A G G A G G A A A A A A |             | T.annulata AF214840.1 Hisar.seq     |
| 23  | G A G G A A A A G A A A A A G G A G G A A A A A A |             | T.annulata MF346013.1 Izatnagar.seq |
|     | A A G A T G T T G T T C T C G A T G T T A C T C T |             | Majority                            |
|     |                                                   | 110 120     |                                     |
| 46  | A A G A T G T T G T T C T C G A T G T T A C T C T |             | T.annulata_Jammu_MT113479           |
| 101 | A A G A T G T T G T T C T C G A T G T T A C T C T |             | T.annulata AF214840.1 Hisar.seq     |
| 48  | A A G A T G T T G T T C T C G A T G T T A C T C T |             | T.annulata MF346013.1 Izatnagar.seq |
|     | C A C T T C A T G T G A G A A T G T A A C C T T T |             | Majority                            |
|     |                                                   | 130 140 150 |                                     |
| 71  | C A C T T C A T G T G A G A A T G T A A C C T T T |             | T.annulata_Jammu_MT113479           |
| 126 | C A C T T C A T G T G A G A A T G T A A C C T T T |             | T.annulata AF214840.1 Hisar.seq     |
| 73  | C A C T T C A T G T G A G A A T G T A A C C T T T |             | T.annulata MF346013.1 Izatnagar.seq |
|     | A A A A A C G T C G A C C C T A A C A C C A C T G |             | Majority                            |
|     |                                                   | 160 170     |                                     |
| 96  | A A A A A C G T C G A C C C T A A C A C C A C T G |             | T.annulata_Jammu_MT113479           |
| 151 | A A A A A C G T C G A C C C T A A C A C C A C T G |             | T.annulata AF214840.1 Hisar.seq     |
| 98  | A A A A A C G T C G A C C C T A A C A C C A C T G |             | T.annulata MF346013.1 Izatnagar.seq |
|     | A G T T A A C T G T C A A A G A C G G C T T C C G |             | Majority                            |
|     |                                                   | 180 190 200 |                                     |
| 121 | A G T T A A C T G T C A A A G A C G G C T T C C G |             | T.annulata_Jammu_MT113479           |
| 176 | A G T T A A C T G T C A A A G A C G G C T T C C G |             | T.annulata AF214840.1 Hisar.seq     |
| 123 | A G T T A A C T G T C A A A G A A G G C T T C C G |             | T.annulata MF346013.1 Izatnagar.seq |
|     | T T T C A A G A C C C T T A A G G T C G G A G A C |             | Majority                            |
|     |                                                   | 210 220     |                                     |
| 146 | T T T C A A G A C C C T T A A G G T C G G A G A C |             | T.annulata_Jammu_MT113479           |
| 201 | T T T C A A G A C C C T T A A G G T C G G A G A C |             | T.annulata AF214840.1 Hisar.seq     |
| 148 | T T T C A A G A C C C T T A A G G T C G G A G A C |             | T.annulata MF346013.1 Izatnagar.seq |

Sunday, March 30, 2014 4:17 PM

|     |                                                                 |                                     |
|-----|-----------------------------------------------------------------|-------------------------------------|
|     | A A G A C C T T G T T C A A T G T T G A C A C C T               | Majority                            |
|     | 230 240 250                                                     |                                     |
| 171 | A A G A C C T T G T T C A A T G T T G A C A C C T               | T.annulata_Jammu_MT113479           |
| 226 | A A G A C C T T G T T C A A T G T T G A C A C C T               | T.annulata_AF214840.1_Hisar.seq     |
| 173 | A A G A C C T T G T T C A A T G T T G A C A C C T               | T.annulata_MF346013.1_Izatnagar.seq |
|     | C A A A A C A T A C C C C A G T A C A G G C A T T               | Majority                            |
|     | 260 270                                                         |                                     |
| 196 | C A A A A C A T A C C C C A G T A C A G G C A T T               | T.annulata_Jammu_MT113479           |
| 251 | C A A A A C A T A C C C C A G T A C A G G C A T T               | T.annulata_AF214840.1_Hisar.seq     |
| 198 | C A A A A C A T A C C C C A G T A C A G G C A T T               | T.annulata_MF346013.1_Izatnagar.seq |
|     | C A A A C T T A A G C A T G A A T C C G A T G A G               | Majority                            |
|     | 280 290 300                                                     |                                     |
| 221 | C A A A C T T A A G C A T G A A T C C G A T G A G               | T.annulata_Jammu_MT113479           |
| 276 | C A A A C T T A A G C A T G A A T C C G A T G A G               | T.annulata_AF214840.1_Hisar.seq     |
| 223 | C A A A C T T A A G C A T G A A T C C G A T G A G               | T.annulata_MF346013.1_Izatnagar.seq |
|     | T G G T T C A G A C T T A A T C T T C A T G C T G               | Majority                            |
|     | 310 320                                                         |                                     |
| 246 | T G G T T C A G A C T T A A T C T T C A T G C T G               | T.annulata_Jammu_MT113479           |
| 301 | T G G T T C A G A C T T A A T C T T C A T G C T G               | T.annulata_AF214840.1_Hisar.seq     |
| 248 | T G G T T C A G A C T T A A T C T T C A T G C T G               | T.annulata_MF346013.1_Izatnagar.seq |
|     | C C C A G C C A A A G A T G T T C A A G A A G A A               | Majority                            |
|     | 330 340 350                                                     |                                     |
| 271 | C C C A G C C A A A G A T G T T C A A G A A G A A               | T.annulata_Jammu_MT113479           |
| 326 | C C C A G C C A A A G A T G T T C A A G A A G A A               | T.annulata_AF214840.1_Hisar.seq     |
| 273 | C C C A G C C A A A G A T G T T C A A G A A G A A               | T.annulata_MF346013.1_Izatnagar.seq |
|     | G G G A G A C A A G G A A T A T T C T G A G G T C               | Majority                            |
|     | 360 370                                                         |                                     |
| 296 | G G G A G A C A A G G A A T A T T C T G A G G T C               | T.annulata_Jammu_MT113479           |
| 351 | G G G A G A C A A G G A A T A T T C T G A G G T C               | T.annulata_AF214840.1_Hisar.seq     |
| 298 | G G G A G A C A A G G A A T A T T C T G A G G T C               | T.annulata_MF346013.1_Izatnagar.seq |
|     | A A A T T C G A G A C C T A C T A C G A T G A T G               | Majority                            |
|     | 380 390 400                                                     |                                     |
| 321 | A A A T T C G A G A C C T A C T A C G A T G A T G               | T.annulata_Jammu_MT113479           |
| 376 | A A A T T C G A G A C C T A C T A C G A T G A T G               | T.annulata_AF214840.1_Hisar.seq     |
| 323 | A A A T T C G A G A C C T A C T A C G A T G A T G               | T.annulata_MF346013.1_Izatnagar.seq |
|     | T C T T G T T C A A G G G A A A A T C C G C C A A               | Majority                            |
|     | 410 420                                                         |                                     |
| 346 | T C T T G T T C A A G G G A A A A T C C G C C A A               | T.annulata_Jammu_MT113479           |
| 401 | T C T T G T T C A A G G G A A A A T C <b>A</b> G C <b>A</b> A A | T.annulata_AF214840.1_Hisar.seq     |
| 348 | T C T T G T T C A A G G G A A A A T C C G C C A A               | T.annulata_MF346013.1_Izatnagar.seq |
|     | G G A A C T A G A T G T T T C C A A A T T C G A A               | Majority                            |
|     | 430 440 450                                                     |                                     |
| 371 | G G A A C T A G A T G T T T C C A A A T T C G A A               | T.annulata_Jammu_MT113479           |
| 426 | G G A A C T A G A T G T T T C C A A <b>G</b> T T C G A A        | T.annulata_AF214840.1_Hisar.seq     |
| 373 | G G A A C T A G A T G T T T C C A A A T T C G A A               | T.annulata_MF346013.1_Izatnagar.seq |

Sunday, March 30, 2014 4:17 PM

|     |                                                                                         |                                     |
|-----|-----------------------------------------------------------------------------------------|-------------------------------------|
|     | G A T A C A G C T T T G T T C A C C G C C T C C G                                       | Majority                            |
|     | 460 <span style="margin-left: 100px;">470</span>                                        |                                     |
| 396 | G A T A C A G C T T T G T T C A C C G C C T C C G                                       | T.annulata_Jammu_MT113479           |
| 451 | G A T <b>C</b> A G C T T T G T T C A C C <b>C</b> C C T C C G                           | T.annulata_AF214840.1_Hisar.seq     |
| 398 | G A T A C A G C T T T G T T C A C C G C C T C C G                                       | T.annulata_MF346013.1_Izatnagar.seq |
|     | C C T T T G G C A C T G G A A G G A A G T A C A C                                       | Majority                            |
|     | 480 <span style="margin-left: 100px;">490</span> <span style="float: right;">500</span> |                                     |
| 421 | C C T T T G G C A C T G G A A G G A A G T A C A C                                       | T.annulata_Jammu_MT113479           |
| 476 | C C T T <b>C</b> G G C A C T G G A A G G A A G T A C A C                                | T.annulata_AF214840.1_Hisar.seq     |
| 423 | C C T T T G G C A C T G G A A G G A A G T A C A C                                       | T.annulata_MF346013.1_Izatnagar.seq |
|     | C T T T A A A A A G G A T T T C A A A C C T T C C                                       | Majority                            |
|     | 510 <span style="margin-left: 100px;">520</span>                                        |                                     |
| 446 | C T T T A A A A A G G A T T T C A A A C C T T C C                                       | T.annulata_Jammu_MT113479           |
| 501 | C T T T A A A A A G G A T T T C A A A C C T T C C                                       | T.annulata_AF214840.1_Hisar.seq     |
| 448 | C T T T A A A A A G G A T T T C A A A C C T T C C                                       | T.annulata_MF346013.1_Izatnagar.seq |
|     | A A A G T T C T C T T C G A A A A G A A A G A A G                                       | Majority                            |
|     | 530 <span style="margin-left: 100px;">540</span> <span style="float: right;">550</span> |                                     |
| 471 | A A A G T T C T C T T C G A A A A G A A A G A A G                                       | T.annulata_Jammu_MT113479           |
| 526 | A A A G T T C T C T T C G A A A A G A A A G A A G                                       | T.annulata_AF214840.1_Hisar.seq     |
| 473 | A A A G T T C T C T T C G A A A A G A A A G A A G                                       | T.annulata_MF346013.1_Izatnagar.seq |
|     | T C G G A A A A C C A A A C A A T G C C A A G T A                                       | Majority                            |
|     | 560 <span style="margin-left: 100px;">570</span>                                        |                                     |
| 496 | T C G G A A A A C C A A A C A A T G C C A A G T A                                       | T.annulata_Jammu_MT113479           |
| 551 | T C G G A A A A C C A A A C A A T G C C A A G T A                                       | T.annulata_AF214840.1_Hisar.seq     |
| 498 | T C G G A A A A C C A A A C A A T G C C A A G T A                                       | T.annulata_MF346013.1_Izatnagar.seq |
|     | T C T T G A T G T T T T C G T C T T T G T C A G T                                       | Majority                            |
|     | 580 <span style="margin-left: 100px;">590</span> <span style="float: right;">600</span> |                                     |
| 521 | T C T T G A T G T T T T C G T C T T T G T C A G T                                       | T.annulata_Jammu_MT113479           |
| 576 | T C T T G A T G T T T T C G T C T T T G T C A G T                                       | T.annulata_AF214840.1_Hisar.seq     |
| 523 | T C T T G A T G T T T T C G T C T T T G T C A G T                                       | T.annulata_MF346013.1_Izatnagar.seq |
|     | G C T G A T T C C A A G A A G G T C G T C A G A C                                       | Majority                            |
|     | 610 <span style="margin-left: 100px;">620</span>                                        |                                     |
| 546 | G C T G A T T C C A A G A A G G T C G T C A G A C                                       | T.annulata_Jammu_MT113479           |
| 601 | G C T G A T T C C A A G A A G G T C G T C A G A C                                       | T.annulata_AF214840.1_Hisar.seq     |
| 548 | G C T G A T T C C A A G A A G G T C G T C A G A C                                       | T.annulata_MF346013.1_Izatnagar.seq |
|     | T C G A C T A C T T C T A T A C C G G T G A C T C                                       | Majority                            |
|     | 630 <span style="margin-left: 100px;">640</span> <span style="float: right;">650</span> |                                     |
| 571 | T C G A C T A C T T C T A T A C C G G T G A C T C                                       | T.annulata_Jammu_MT113479           |
| 626 | T C G A C T A C T T C T A T A C C G G T G A C T C                                       | T.annulata_AF214840.1_Hisar.seq     |
| 573 | T C G A C T A C T T C T A T A C C G G T G A C T C                                       | T.annulata_MF346013.1_Izatnagar.seq |
|     | A A G G T T G A A G G A G A C C T A C T T C G A G                                       | Majority                            |
|     | 660 <span style="margin-left: 100px;">670</span>                                        |                                     |
| 596 | A A G G T T G A A G G A G A C C T A C T T C G A G                                       | T.annulata_Jammu_MT113479           |
| 651 | A A G G T T G A A G G A G A C C T A C T T C G A G                                       | T.annulata_AF214840.1_Hisar.seq     |
| 598 | A A G G T T G A A G G <b>G</b> G A C <b>A</b> T A C T T C G A G                         | T.annulata_MF346013.1_Izatnagar.seq |
